# Supplementary material
Source: HighWire-hosted journal article supplement (https://www.cmaj.ca/highwire/filestream/59768/field_highwire_adjunct_files/0/151169-res-1-at.pdf)
Supplement: 151169-res-1-at.pdf [file 151169-res-1-at.pdf]

**Appendix 1 (as supplied by the authors): Comparison of students included vs. excluded from the analysis.**

|                       |          | <b>Excluded</b>     |          | <b>Included</b>       |                |
|-----------------------|----------|---------------------|----------|-----------------------|----------------|
| <b>Variables</b>      | <b>N</b> | <b>Value</b>        | <b>N</b> | <b>Value</b>          | <b>P-value</b> |
| Male                  | 945      | 464 (49%)           | 2367     | 1274 (54%)            |                |
| Age                   | 945      | 14.2 (13.9-14.5)    | 2367     | 14.6 (14.4 - 14.9)    | <0.001         |
| Current smoking       | 927      | 16 (2%)             | 2286     | 29 (1%)               | 0.32           |
| Previous smoking      | 931      | 50 (5%)             | 2289     | 122 (5%)              | 1.00           |
| Low income            | 469      | 248 (53%)           | 1224     | 633 (52%)             | 0.70           |
| Height (cm)           | 936      | 165.5 (160.0-170.9) | 2303     | 166.7 (161.0 - 172.4) | <0.001         |
| Weight (kg)           | 935      | 57.8 (50.6-68.4)    | 2300     | 59.0 (51.9 - 68.7)    | 0.06           |
| Waist (cm)            | 934      | 69.7 (64.2-77.8)    | 2300     | 70.1 (65.2 - 77.3)    | 0.14           |
| Diastolic BP          | 925      | 65 (60-70)          | 2291     | 66 (61 - 72)          | <0.001         |
| Systolic BP           | 925      | 103 (96-110)        | 2291     | 105 (98 - 112)        | <0.001         |
| HDL                   | 128      | 1.30 (0.99-1.54)    | 2055     | 1.24 (1.04 - 1.48)    | 0.50           |
| Total cholesterol     | 128      | 3.84 (3.43-4.22)    | 2055     | 3.87 (3.42 - 4.33)    | 0.76           |
| <i>Overall health</i> |          |                     |          |                       | 0.46           |
| Poor                  | 24       | 0 (0%)              | 2203     | 18 (1%)               |                |
| Fair                  | 24       | 3 (13%)             | 2203     | 144 (7%)              |                |
| Good                  | 24       | 10 (42%)            | 2203     | 704 (32%)             |                |
| Very good             | 24       | 7 (29%)             | 2203     | 868 (39%)             |                |
| Excellent             | 24       | 4 (17%)             | 2203     | 469 (21%)             |                |
| <i>Stress level</i>   |          |                     |          |                       | 0.65           |
| Poor                  | 24       | 0 (0%)              | 2202     | 43 (2%)               |                |
| Fair                  | 24       | 0 (0%)              | 2202     | 160 (7%)              |                |
| Good                  | 24       | 6 (25%)             | 2202     | 508 (23%)             |                |
| Very good             | 24       | 9 (38%)             | 2202     | 783 (36%)             |                |
| Excellent             | 24       | 9 (38%)             | 2202     | 708 (32%)             |                |
|                       |          |                     |          |                       |                |
|                       |          |                     |          |                       |                |
|                       |          |                     |          |                       |                |
|                       |          |                     |          |                       |                |
